# Supplementary material
Source: PubMed Central journal article supplement (PMC8644590)
Supplement: kiab432_supplementary_data.pdf [file kiab432_supplementary_data.pdf]

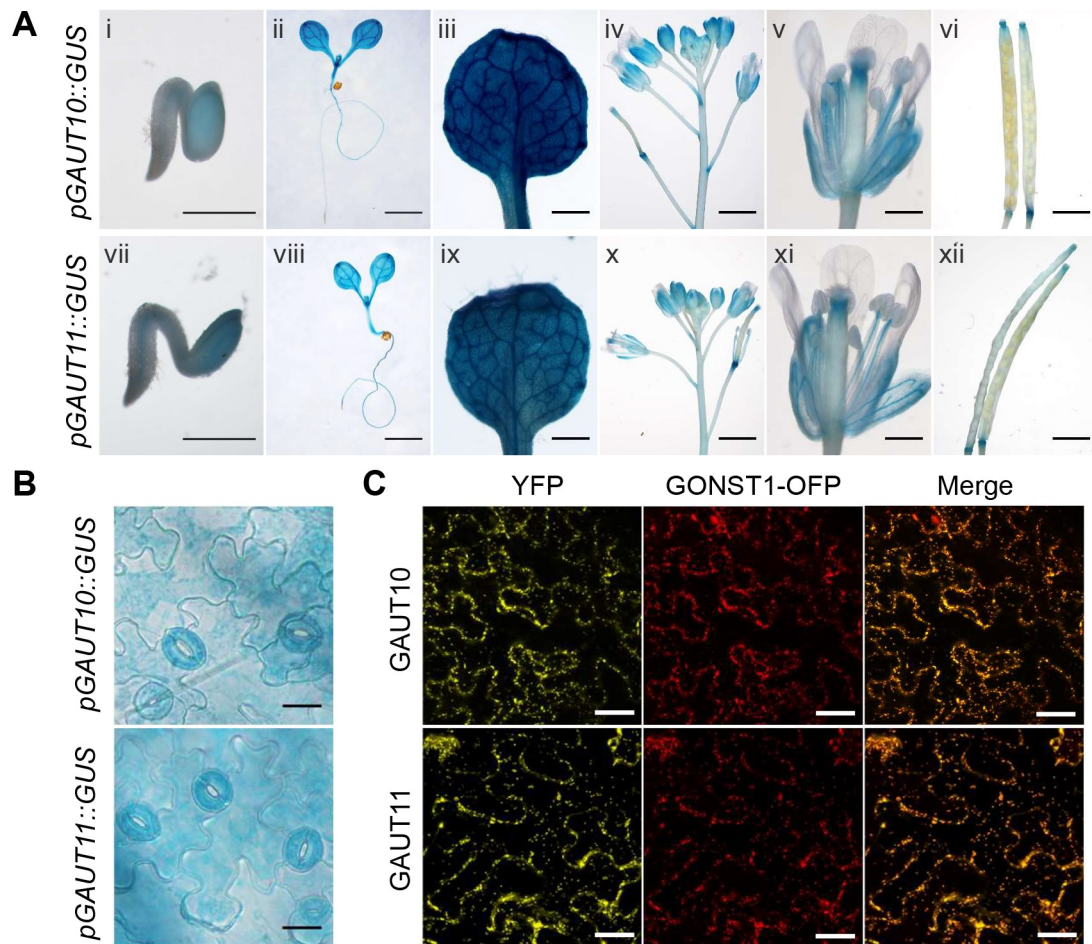

**Supplemental Figure S1. Expression pattern and subcellular localization of GAUT10 and GAUT11.**

A, GUS staining of tissues from *pGAUT10::GUS* and *pGAUT11::GUS* transgenic plants. (i) and (vii), 1-d-old embryo; (ii) and (viii), 6-d-old light-grown seedling; (iii) and (ix), true leaf from 9-d-old seedlings; (iv) and (x), inflorescence from 4-week-old plants; (v) and (xi), a flower; (vi) and (xii), siliques. Bars = 0.5 mm in (i), (iii), (v), (vii), (ix) and (xi), and 2 mm in (ii), (iv), (vi), (viii), (x) and (xii). B, GUS staining of rosette leaves from 3-week-old *pGAUT10::GUS* and *pGAUT11::GUS* transgenic lines. The GUS signals were abundant in guard cells. Bars = 20  $\mu$ m. C, YFP-tagged GAUT10 and GAUT11 fusion proteins are co-localized with GONST1-OFP (Golgi apparatus marker) in Golgi in young *Nicotiana. benthamiana* leaf epidermis. The signals were visualized with a laser confocal microscope. Bars = 25  $\mu$ m.

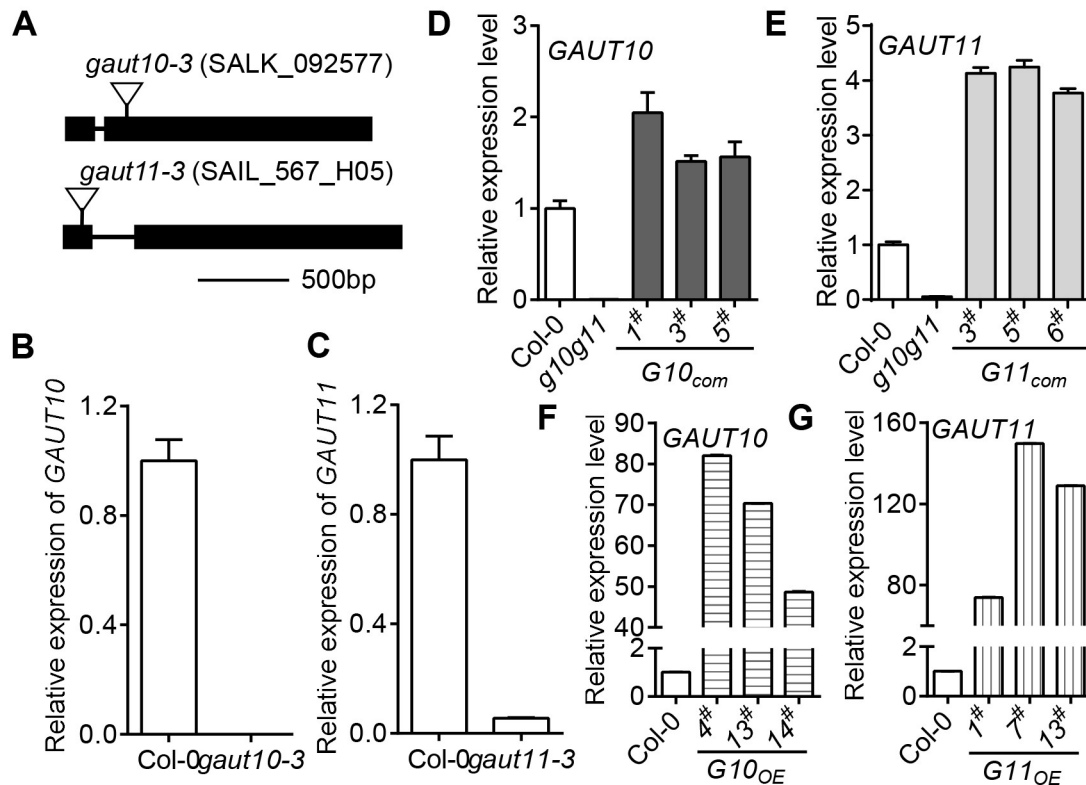

**Supplemental Figure S2. Gene structure and transcript analyses of *GAUT10* and *GAUT11*.**

A, Genomic structure of *GAUT10* and *GAUT11* genes and T-DNA insertions in the *gaut10-3* and *gaut11-3* mutant lines. Exons and introns are indicated as black box and black line, respectively. Inverted triangles represent the sites of T-DNA insertion. B and C, RT-qPCR analysis of *GAUT10* and *GAUT11* transcript abundance using gene-specific primers in *gaut10-3* (B) and *gaut11-3* (C) plants, respectively. Values are means  $\pm$  SE.  $n \geq 3$ . D and E, RT-qPCR quantification of *GAUT10* and *GAUT11* expression levels in *Col-0*, *g10g11*, *GAUT10* complementation (*G10<sub>com</sub>* 1#, 3#, 5#) lines (D) and *GAUT11* complementation (*G11<sub>com</sub>* 3#, 5#, 6#) lines (E), respectively. Values are means  $\pm$  SE.  $n \geq 3$ . F and G, RT-qPCR quantification of *GAUT10* and *GAUT11* expression levels in *Col*, *g10g11*, *GAUT10* overexpression (*G10<sub>OE</sub>* 4#, 13#, 14#) lines (F) and *GAUT11* overexpression (*G11<sub>OE</sub>* 1#, 7#, 13#) lines (G), respectively. Values are means  $\pm$  SE.  $n \geq 3$ .

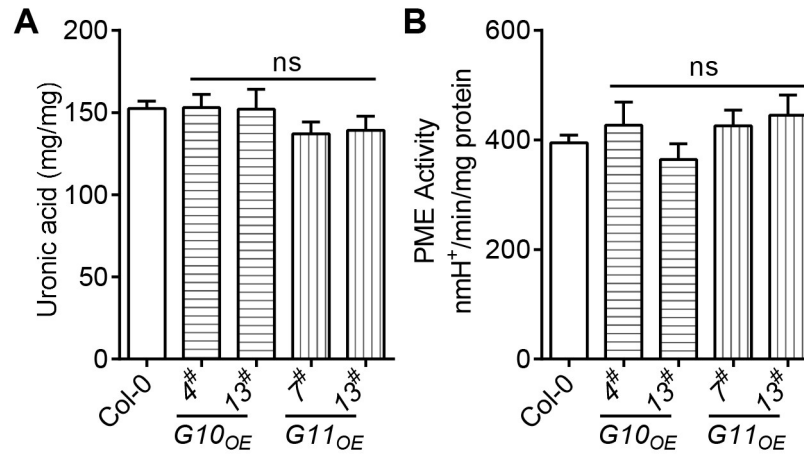

**Supplemental Figure S3. Total uronic acid content and PME activity are not changed in *GAUT10* or *GAUT11* overexpression lines.**

A, Uronic acid measurements in the leaves of 4-week-old Col-0, *GAUT10*-overexpression ( $G10_{OE}$  4#, 13#) and *GAUT11*-overexpression ( $G11_{OE}$  7#, 13#) plants. Values are means  $\pm$  SE, three biological replicates. No significantly difference (ns),  $P \geq 0.05$ ; Student's *t*-test. B, PME activity in the leaves of 4-week-old Col-0, *GAUT10*-overexpression ( $G10_{OE}$  4#, 13#) and *GAUT11*-overexpression ( $G11_{OE}$  7#, 13#) plants. Values are means  $\pm$  SE, three biological replicates. No significantly difference (ns),  $P \geq 0.05$ ; Student's *t*-test.

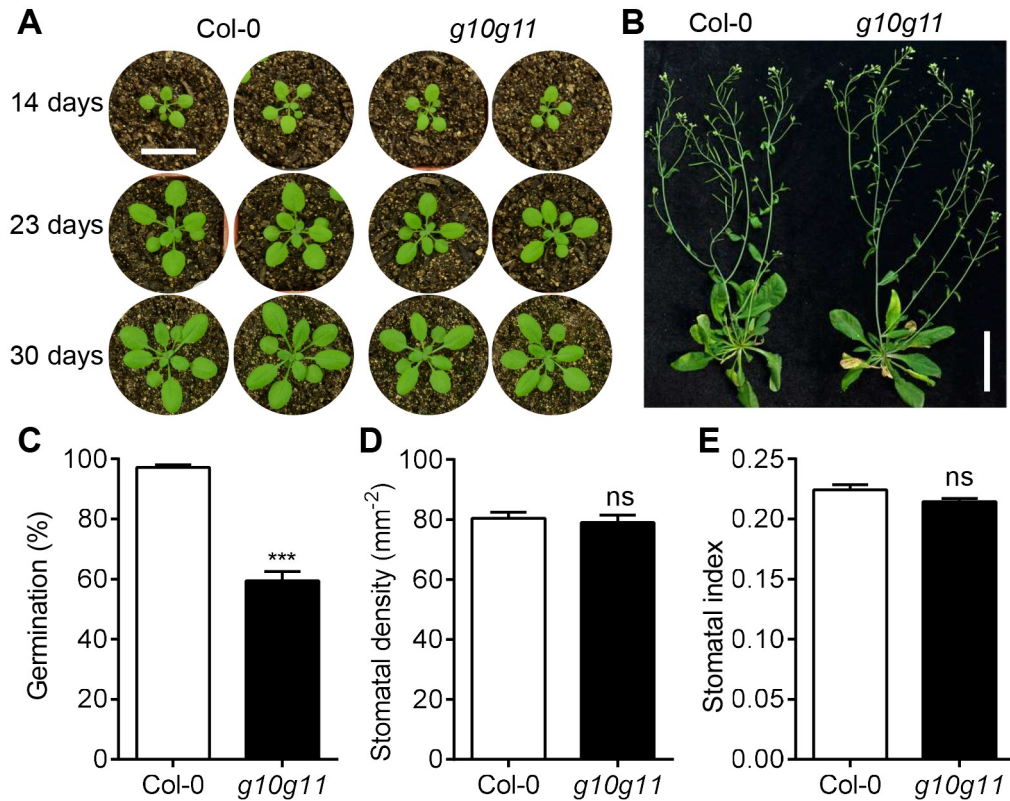

**Supplemental Figure S4. Phenotypic characterization of *g10g11* mutant.**

A, Images of Col-0 and *g10g11* plants. Bars = 3 cm. B, Col-0 and *g10g11* plants had similar plant height. Bars = 5 cm. C, Seed germination of Col-0 and *g10g11* under light conditions. Values are means  $\pm$  SE.  $n \geq 200$  seeds per genotype, \*\*\* $P < 0.001$ ; Student's *t*-test. D, Stomata density in the abaxial epidermis from Col-0 and *g10g11* plants grown under normal growth conditions. Values are means  $\pm$  SE.  $n \geq 10$  leaves per genotype, No significantly difference (ns),  $P \geq 0.05$ ; Student's *t*-test. E, Stomata index (the ratio of the number of stomata per unit area to the number of epidermal cells) in the abaxial epidermis from Col-0 and *g10g11* plants grown under normal condition. Values are means  $\pm$  SE.  $n \geq 10$  leaves per genotype, No significantly difference (ns),  $P \geq 0.05$ ; Student's *t*-test.

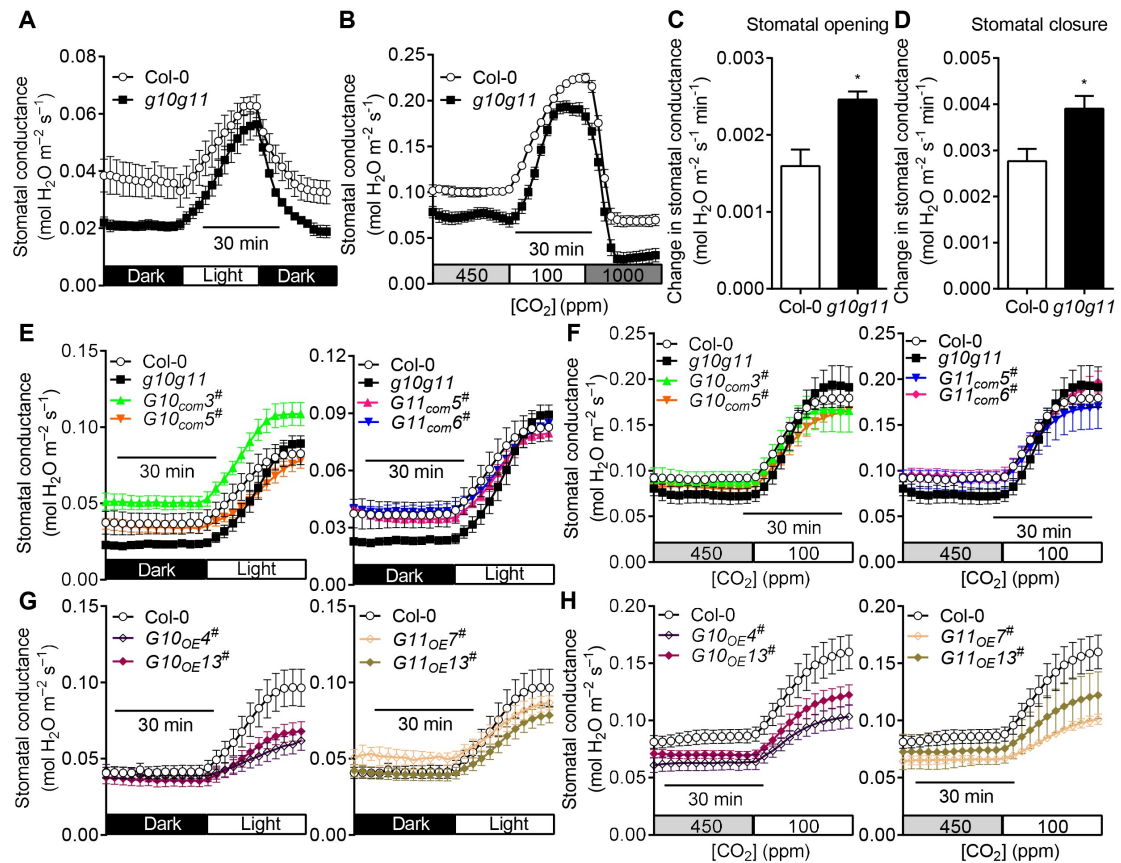

**Supplemental Figure S5. *GAUT10* and *GAUT11* modulate stomatal dynamics in response to light and CO<sub>2</sub> changes.**

A and B, Stomatal conductance of Col-0 and *g10g11* plants in response to changes in light intensity or CO<sub>2</sub> concentrations. Original data of Fig 5A-B. Experiments are repeated three times. Values are means  $\pm$  SE,  $n \geq 3$  leaves per genotype per experiment. C and D, Changes in stomatal conductance of Col-0 and *g10g11* plants per minute during stomatal opening (C) and stomatal closure (D) in response to CO<sub>2</sub> concentration changes in (B). Values are means  $\pm$  SE, \* $P < 0.05$ ; Student's *t*-test. E and F, Stomatal conductance of Col-0, *g10g11*, *GAUT10* and *GAUT11* complementation lines in response to light intensity or CO<sub>2</sub> concentration changes. Experiments are repeated three times. Values are means  $\pm$  SE,  $n \geq 3$  leaves per genotype per experiment. Original data of Fig 5C-D. G and H, Stomatal conductance in Col-0, *g10g11*, *GAUT10* and *GAUT11* overexpression lines in response to light intensity or CO<sub>2</sub> concentrations changes. Original data of Fig 5E-F. Experiments are repeated three times. Values are means  $\pm$  SE,  $n \geq 3$  leaves per genotype per experiment.

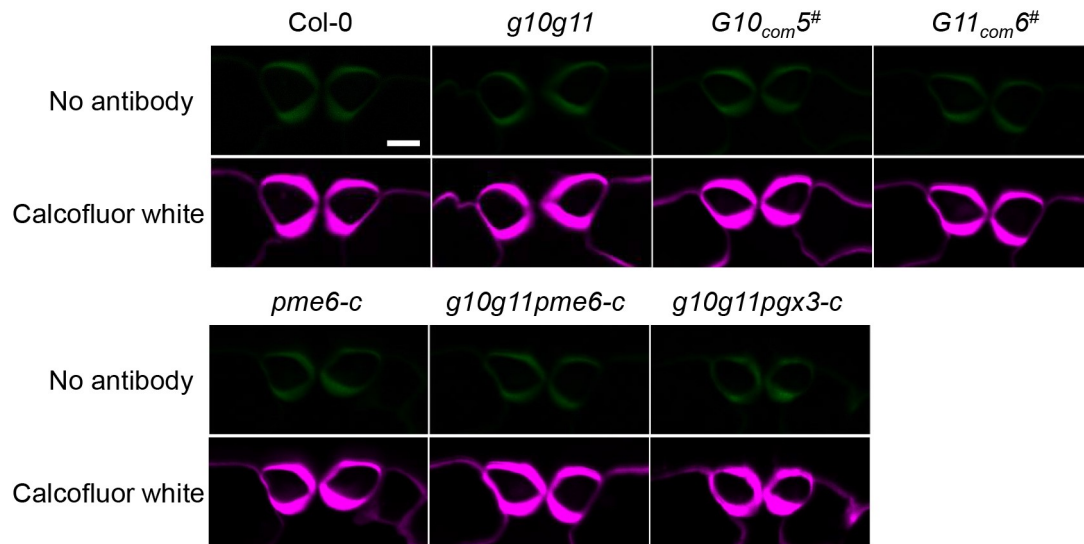

**Supplemental Figure S6. Control images for immunolabeling in guard cell walls.**

Sample controls were incubated with anti-rat-IgG coupled to fluorescein isothiocyanate (FITC) without primary antibody (LM19 or LM20). Samples show a very low level of fluorescence in the green channel, the magenta signal indicates Calcofluor White fluorescence in the same guard cell pairs. Bars = 5  $\mu$ m.

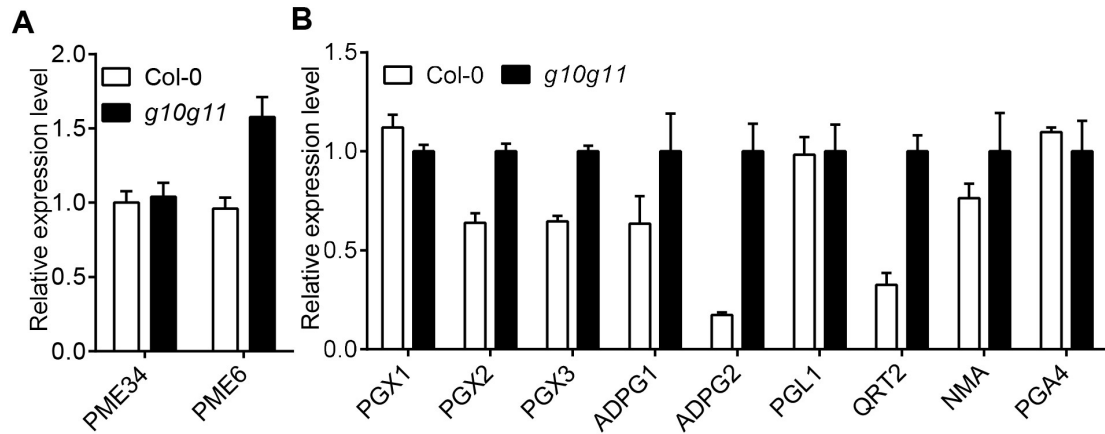

**Supplemental Figure S7. Expression levels of *PME* and *PG* genes in the *g10g11* mutant.**

A, Expression levels of *PME34* and *PME6* in rosette leaves from 3- to 4-week-old Col-0 controls and *g10g11* mutants. Values are means  $\pm$  SE.  $n \geq 3$ . B, Expression levels of *PGX1*, *PGX2*, *PGX3*, *ADPG1*, *ADPG2*, *PGL1*, *QRT2*, *NMA*, and *PGA4* in rosette leaves from 3- to 4-week-old Col-0 and *g10g11* plants. Values are means  $\pm$  SE.  $n \geq 3$ .

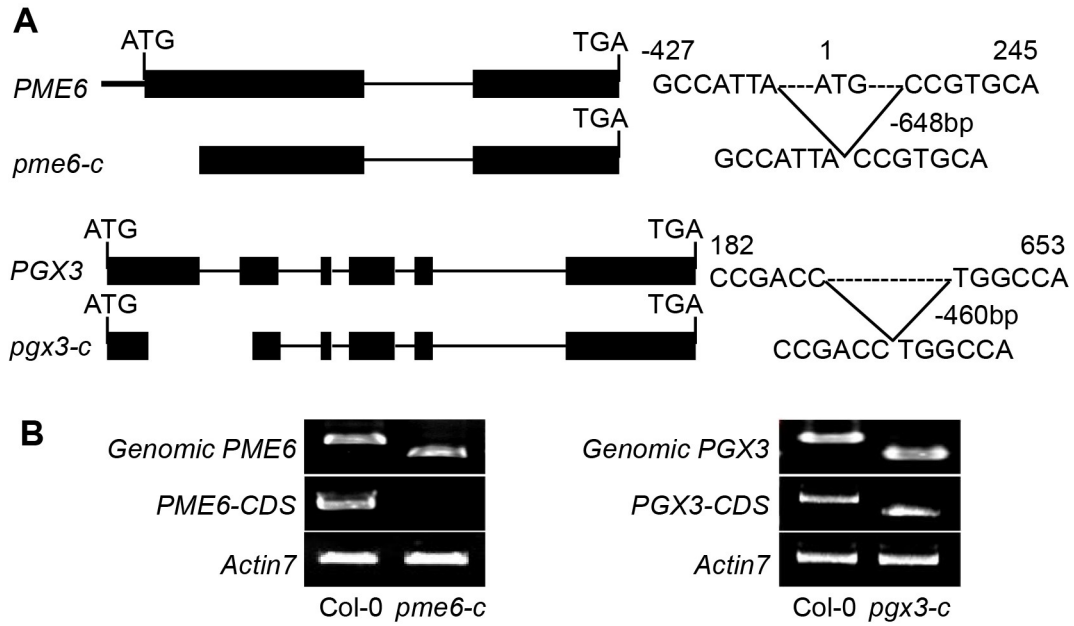

**Supplemental Figure S8. Schematic of gene structure and transcript analyses of *PME6* and *PGX3*.**

A, A brief structure diagrams show the editing sites of *PME6* and *PGX3* genes in *pme6-c* (*pme6-crispr*) and *pgx3-c* (*pgx3-crispr*), respectively. Exons are represented by boxes and introns by light lines, heavy black line indicates promoter region. Blank areas represent deletion regions. B, RT-PCR analyses of *PME6* and *PGX3* transcript levels in *pme6-c* and *pgx3-c* mutants, respectively. *Actin7* was served as a control.



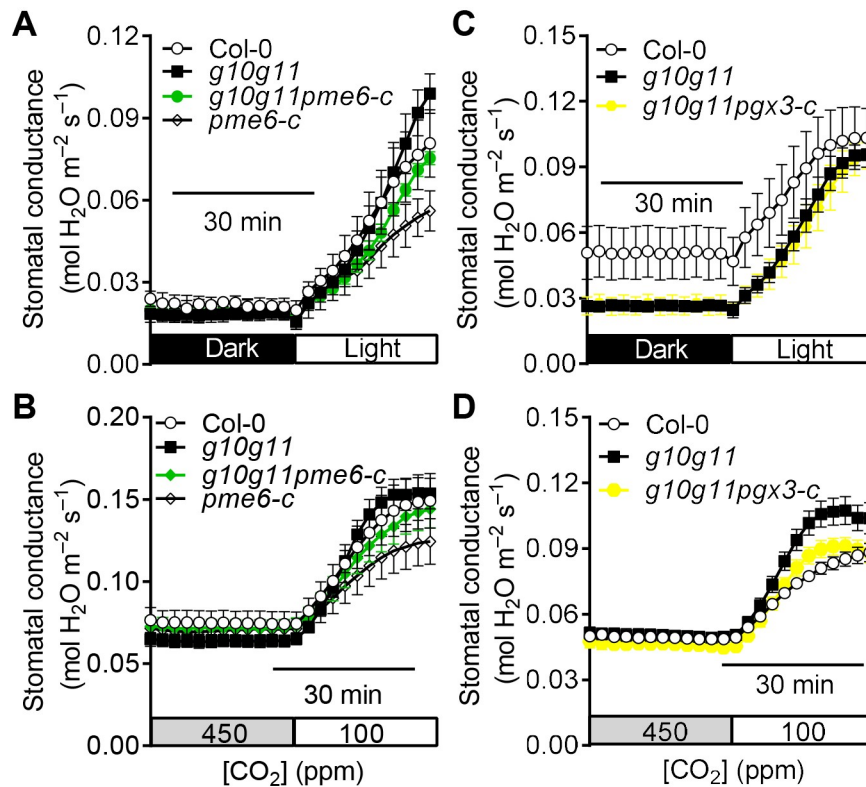

**Supplemental Figure S9. *PME6* mutation rescues stomatal dynamic response to CO<sub>2</sub> and light changes in *g10g11*.**

A and B, Stomatal conductance of Col-0, *g10g11*, *pme6-c* and *g10g11pme6-c* in response to light intensity or CO<sub>2</sub> concentration changes. Original data of Fig 7E-F. Values are means  $\pm$  SE,  $n \geq 3$  leaves per genotype per experiment. Experiments are repeated three times. C and D, Stomatal conductance of Col-0, *g10g11*, and *g10g11pgx3-c* in response to light intensity or CO<sub>2</sub> concentration changes. Original data of Fig 8E-F. Values are means indicate  $\pm$  SE,  $n \geq 3$  leaves per genotype per experiment. Experiments are repeated three times.

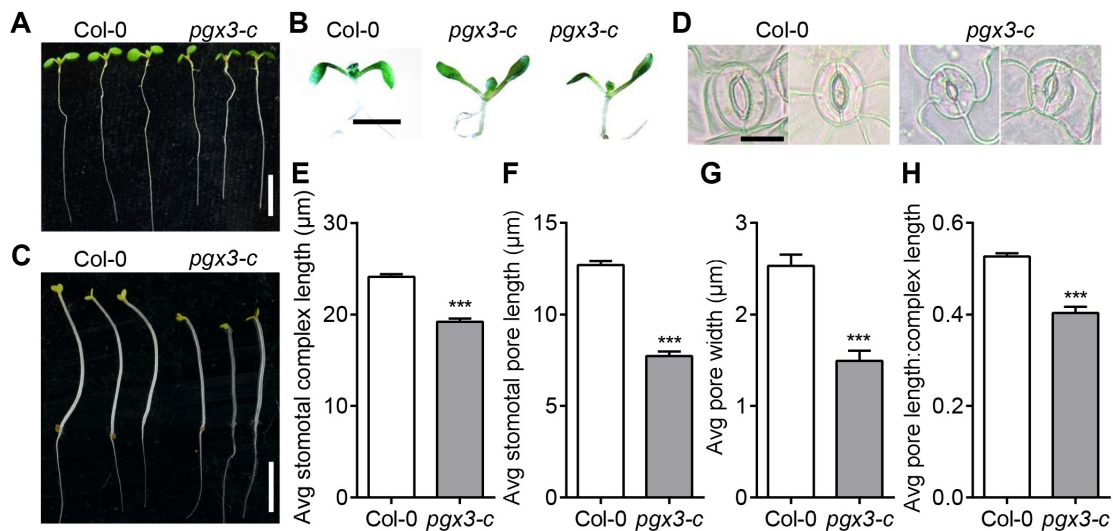

**Supplemental Figure S10. *pgx3-c* mutant showed defects in seedling development and cotyledon stomatal development.**

A, Light-grown *pgx3-c* seedlings (6-day-old) exhibited shorter primary root length. Bar = 0.5 cm. B, Cotyledon shape of 7-day-old Col-0 and *pgx3-c* seedlings. C, Dark-grown *pgx3-c* seedlings (4-day-old) showed shorter etiolated hypocotyl compared with Col-0. Bar = 0.5 cm. D, Cotyledon stomata in 7-day-old Col-0 and *pgx3-c* seedlings. Bar = 15 μm. E-H, Measurements of cotyledon stomatal complex length (E), pore length (F), pore width (G) and the ratio of pore length to stomatal complex length (H) in 7-day-old Col-0 and *pgx3-c* seedlings. Values are means ± SE ( $n \geq 60$  stomata from at least 6 plants per genotype, \*\*\* $P < 0.001$ ; Student's *t*-test).

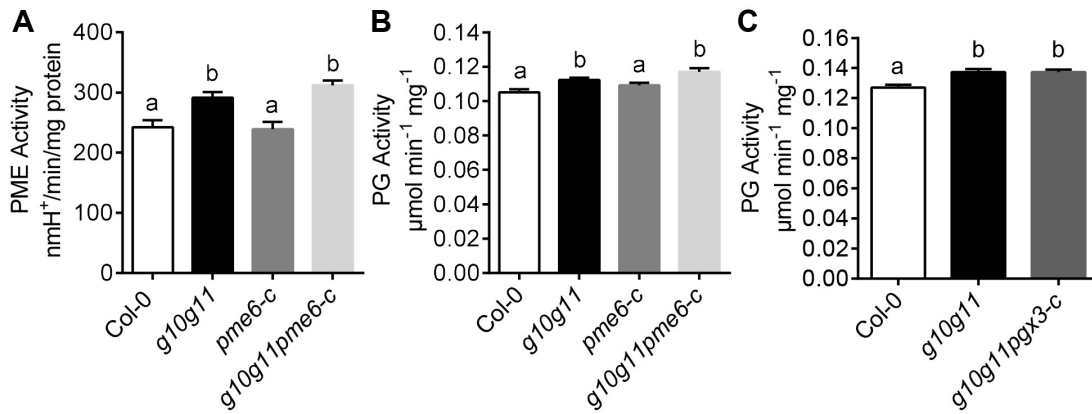

**Supplemental Figure S11. Mutation of *PME6* or *PGX3* does not affect the increased PME or PG activity in the *g10g11* mutant.**

A, PME activity in the leaves of 4-week-old Col-0, *g10g11*, *pme6-c* and *g10g11pme6-c* plants. Values are means  $\pm$  SE, three biological replicates;  $P < 0.05$ , one-way ANOVA and Tukey's test. B, PG activity in the leaves of 4-week-old Col-0, *g10g11*, *pme6-c* and *g10g11pme6-c* plants. Values are means  $\pm$  SE, three biological replicates;  $P < 0.05$ , one-way ANOVA and Tukey's test. C, PG activity in the leaves of 4-week-old Col-0, *g10g11* and *g10g11pgx3-c* plants. Values are means  $\pm$  SE, three biological replicates;  $P < 0.05$ , one-way ANOVA and Tukey's test.

**Supplemental Table S1. Primers used in this study.**

| Primer name        | Primer sequence (5'-3')           | Method               | Vector                                                 | Usage           |
|--------------------|-----------------------------------|----------------------|--------------------------------------------------------|-----------------|
| <i>gaut10-3-LP</i> | AGAGTCTTGCAGCTGCTTGAG             |                      |                                                        | Genotyping      |
| <i>gaut10-3-RP</i> | TTTGACGCGAAGAGAAAAGAAG            |                      |                                                        | Genotyping      |
| <i>gaut11-3-LP</i> | CAACCAATTGCCCAAATATTG             |                      |                                                        | Genotyping      |
| <i>gaut11-3-RP</i> | GAAAACCCGAAAGGAGAAAAG             |                      |                                                        | Genotyping      |
| SALK-LBb1.3        | ATTTTGCCGATTTCCGGAAC              |                      |                                                        | Genotyping      |
| SAIL-LB3           | TAGCATCTGAATTCATAACCAATCTCGATACAC |                      |                                                        | Genotyping      |
| qGAUT10-F          | ACCTAGACCCTCTATTCTTAAGCG          |                      |                                                        | RT-qPCR         |
| qGAUT10-R          | TGACGAGCAACGGAAGTAGGAC            |                      |                                                        | RT-qPCR         |
| qGAUT11-F          | GCGAGGTAGAAGGAGATTGTGCGAG         |                      |                                                        | RT-qPCR         |
| qGAUT11-R          | TCGGTTCTCGTGTCTCTCAAG             |                      |                                                        | RT-qPCR         |
| qPME6-F            | GTTATAAAGACGGTGACAGAG             |                      |                                                        | RT-qPCR         |
| qPME6-R            | CCGTAGCCGTAATCCAATAG              |                      |                                                        | RT-qPCR         |
| qPGX3-F            | AAGTCCACCGATTCAATTTCG             |                      |                                                        | RT-qPCR         |
| qPGX3-R            | TCCGGCAATAACTCAACCTC              |                      |                                                        | RT-qPCR         |
| com-GAUT10-F       | GGGGTACCAGTGTAGCAAAGATGAT         | <i>Kpn</i> I         | pGreenII 0179                                          | Complementation |
| com-GAUT10-R       | GGACTAGTGTGTGAATATCAGAGAATAT      | <i>Spe</i> I         | (Hellens et al., 2000)                                 | Complementation |
| com-GAUT11-F       | AGGGGCCCATTTGGTTAGTGTGTAAAT       | <i>Apa</i> I         | pGreenII 0179                                          | Complementation |
| com-GAUT11-R       | GGACTAGTTATTTAAAAACGTAGAACAG      | <i>Spe</i> I         |                                                        | Complementation |
| proGAUT10-F        | GGGGACAAGTTTGTACAAAAAGCAGGCT      | Gateway cloning      | <i>pMDC163</i> (Curtis and Grossniklaus, 2003)         | GUS staining    |
| proGAUT10-R        | GGGGACCACTTTGTACAAGAAAGCTGGGT     |                      |                                                        | GUS staining    |
| proGAUT11-F        | GGGGACAAGTTTGTACAAAAAGCAGGCT      | Gateway Cloning      | <i>pMDC163</i>                                         | GUS staining    |
| proGAUT11-R        | GGGGACCACTTTGTACAAGAAAGCTGGGT     |                      |                                                        | GUS staining    |
| GAUT10-CDS-F       | GGGGACAAGTTTGTACAAAAAGCAGGCT      | Gateway cloning      | pEarleyGate 101<br>(Earley et al., 2006)               | Overexpression  |
| GAUT10-CDS-R       | GGGGACCACTTTGTACAAGAAAGCTGGGT     |                      |                                                        | Overexpression  |
| GAUT11-CDS-F       | GGGGACAAGTTTGTACAAAAAGCAGGCT      | Gateway cloning      | pEarleyGate 101                                        | Overexpression  |
| GAUT11-CDS-R       | GGGGACCACTTTGTACAAGAAAGCTGGGT     |                      |                                                        | Overexpression  |
| target1-PME6       | AGCTATGGCCGCGCTTAACG              | Golden Gate assembly | pYLCRISPR/Cas9P <sub>ubi</sub> -B<br>(Ma et al., 2015) | Crispr editing  |
| target2-PME6       | CCTTGTGGTCAGCTCCACCA              |                      |                                                        | Crispr editing  |
| target1-PGX3       | GGACTCGGGTACGGGTCGGA              | Golden Gate assembly | pHEE401E                                               | Crispr editing  |
| target2-PGX3       | GGCCATTCTCTGGTCCGTC               |                      | (Wang et al., 2015)                                    | Crispr editing  |

**Supplemental Table S2. Measurement of stomatal dimensions in *g10g11* and *GAUT* complementation lines.**

| Genotype                                 | Avg<br>stomatal<br>complex length<br>( $\mu\text{m}$ ) | Avg<br>guard cell<br>width<br>( $\mu\text{m}$ ) | Avg<br>stomatal pore<br>length<br>( $\mu\text{m}$ ) | Avg<br>stomatal pore<br>width<br>( $\mu\text{m}$ ) | Avg<br>pore length/<br>complex<br>length |
|------------------------------------------|--------------------------------------------------------|-------------------------------------------------|-----------------------------------------------------|----------------------------------------------------|------------------------------------------|
| Col-0                                    | 21.99 $\pm$ 0.22 <sup>a</sup>                          | 5.64 $\pm$ 0.09 <sup>a</sup>                    | 11.31 $\pm$ 0.16 <sup>a</sup>                       | 1.910 $\pm$ 0.055 <sup>a</sup>                     | 0.50 $\pm$ 0.005 <sup>a</sup>            |
| <i>g10g11</i>                            | 24.33 $\pm$ 0.19 <sup>b</sup>                          | 6.41 $\pm$ 0.13 <sup>b</sup>                    | 12.97 $\pm$ 0.19 <sup>b</sup>                       | 1.596 $\pm$ 0.079 <sup>b</sup>                     | 0.52 $\pm$ 0.006 <sup>b</sup>            |
| <i>GAUT10<sub>com3</sub><sup>#</sup></i> | 21.94 $\pm$ 0.16 <sup>a</sup>                          | 5.75 $\pm$ 0.13 <sup>a</sup>                    | 11.07 $\pm$ 0.15 <sup>a</sup>                       | 1.999 $\pm$ 0.055 <sup>a</sup>                     | 0.50 $\pm$ 0.008 <sup>a</sup>            |
| <i>GAUT10<sub>com5</sub><sup>#</sup></i> | 21.88 $\pm$ 0.20 <sup>a</sup>                          | 5.76 $\pm$ 0.12 <sup>a</sup>                    | 11.15 $\pm$ 0.15 <sup>a</sup>                       | 1.897 $\pm$ 0.058 <sup>a</sup>                     | 0.49 $\pm$ 0.006 <sup>a</sup>            |
| <i>GAUT11<sub>com5</sub><sup>#</sup></i> | 22.27 $\pm$ 0.16 <sup>a</sup>                          | 5.84 $\pm$ 0.14 <sup>ab</sup>                   | 11.05 $\pm$ 0.15 <sup>a</sup>                       | 1.993 $\pm$ 0.052 <sup>a</sup>                     | 0.50 $\pm$ 0.007 <sup>a</sup>            |
| <i>GAUT11<sub>com6</sub><sup>#</sup></i> | 21.81 $\pm$ 0.19 <sup>a</sup>                          | 5.80 $\pm$ 0.15 <sup>a</sup>                    | 11.00 $\pm$ 0.16 <sup>a</sup>                       | 1.910 $\pm$ 0.059 <sup>a</sup>                     | 0.49 $\pm$ 0.008 <sup>a</sup>            |

Stomatal complex length, guard cell width, pore length, pore width, and the ratio of pore length to stomatal complex length in 3- to 4-week-old Col-0, *g10g11*, *G10<sub>com3</sub><sup>#</sup>*, *G10<sub>com5</sub><sup>#</sup>*, *G11<sub>com5</sub><sup>#</sup>* and *G11<sub>com6</sub><sup>#</sup>* plants. Values are means  $\pm$  SE, ( $n \geq 60$  stomata from at least 6 plants per genotype, three independent experiments;  $P < 0.05$ , one-way ANOVA and Tukey's test).

**Supplemental Table S3. Measurement of stomatal dimensions in cotyledons of Col-0, *g10g11* and *g10g11pgx3-c* plants.**

| Genotype            | Avg<br>stomatal<br>complex length<br>( $\mu\text{m}$ ) | Avg<br>guard cell<br>width<br>( $\mu\text{m}$ ) | Avg<br>stomatal pore<br>length<br>( $\mu\text{m}$ ) | Avg<br>stomatal pore<br>width<br>( $\mu\text{m}$ ) | Avg<br>pore length/<br>complex<br>length |
|---------------------|--------------------------------------------------------|-------------------------------------------------|-----------------------------------------------------|----------------------------------------------------|------------------------------------------|
| Col-0               | 24.29 $\pm$ 0.22 <sup>a</sup>                          | 4.79 $\pm$ 0.06 <sup>a</sup>                    | 13.13 $\pm$ 0.18 <sup>a</sup>                       | 2.909 $\pm$ 0.068 <sup>a</sup>                     | 0.54 $\pm$ 0.004 <sup>a</sup>            |
| <i>g10g11</i>       | 28.53 $\pm$ 0.28 <sup>b</sup>                          | 5.52 $\pm$ 0.14 <sup>b</sup>                    | 16.49 $\pm$ 0.21 <sup>b</sup>                       | 2.820 $\pm$ 0.083 <sup>a</sup>                     | 0.58 $\pm$ 0.004 <sup>b</sup>            |
| <i>g10g11pgx3-c</i> | 28.53 $\pm$ 0.24 <sup>b</sup>                          | 5.76 $\pm$ 0.08 <sup>b</sup>                    | 16.46 $\pm$ 0.17 <sup>b</sup>                       | 2.784 $\pm$ 0.073 <sup>a</sup>                     | 0.58 $\pm$ 0.004 <sup>b</sup>            |

Stomatal complex length, guard cell width, pore length, pore width, and the ratio of pore length to stomatal complex length in cotyledons of 7-day-old Col-0, *g10g11* and *g10g11pgx3-c* seedlings. Values are means  $\pm$  SE, ( $n \geq 60$  stomata from at least 6 plants per genotype, two independent experiments;  $P < 0.05$ , one-way ANOVA and Tukey's test).

**Supplemental Table S4. Measurement of stomatal dimensions in Col-0 and *GAUT* overexpression lines.**

| Genotype                                   | Avg<br>stomatal<br>complex length<br>( $\mu\text{m}$ ) | Avg<br>guard cell<br>width<br>( $\mu\text{m}$ ) | Avg<br>stomatal pore<br>length<br>( $\mu\text{m}$ ) | Avg<br>stomatal pore<br>width<br>( $\mu\text{m}$ ) | Avg<br>pore length/<br>complex<br>length |
|--------------------------------------------|--------------------------------------------------------|-------------------------------------------------|-----------------------------------------------------|----------------------------------------------------|------------------------------------------|
| Col-0                                      | 23.68 $\pm$ 0.22 <sup>a</sup>                          | 5.03 $\pm$ 0.07 <sup>a</sup>                    | 10.66 $\pm$ 0.17 <sup>a</sup>                       | 1.880 $\pm$ 0.059 <sup>a</sup>                     | 0.44 $\pm$ 0.004 <sup>a</sup>            |
| <i>GAUT10</i> <sub>OE4</sub> <sup>#</sup>  | 23.88 $\pm$ 0.20 <sup>a</sup>                          | 5.23 $\pm$ 0.07 <sup>a</sup>                    | 10.59 $\pm$ 0.19 <sup>a</sup>                       | 1.881 $\pm$ 0.071 <sup>a</sup>                     | 0.44 $\pm$ 0.005 <sup>a</sup>            |
| <i>GAUT10</i> <sub>OE13</sub> <sup>#</sup> | 23.18 $\pm$ 0.16 <sup>a</sup>                          | 5.15 $\pm$ 0.07 <sup>a</sup>                    | 10.21 $\pm$ 0.15 <sup>a</sup>                       | 1.843 $\pm$ 0.067 <sup>a</sup>                     | 0.44 $\pm$ 0.006 <sup>a</sup>            |
| <i>GAUT11</i> <sub>OE7</sub> <sup>#</sup>  | 23.39 $\pm$ 0.21 <sup>a</sup>                          | 5.16 $\pm$ 0.06 <sup>a</sup>                    | 10.23 $\pm$ 0.18 <sup>a</sup>                       | 1.826 $\pm$ 0.070 <sup>a</sup>                     | 0.43 $\pm$ 0.005 <sup>a</sup>            |
| <i>GAUT11</i> <sub>OE13</sub> <sup>#</sup> | 24.21 $\pm$ 0.26 <sup>a</sup>                          | 5.23 $\pm$ 0.08 <sup>a</sup>                    | 11.07 $\pm$ 0.19 <sup>a</sup>                       | 1.837 $\pm$ 0.090 <sup>a</sup>                     | 0.45 $\pm$ 0.004 <sup>a</sup>            |

Stomatal complex length, guard cell width, pore length, pore width, and the ratio of pore length to stomatal complex length in 3- to 4-week-old Col-0, *G10*<sub>OE4</sub><sup>#</sup>, *G10*<sub>OE13</sub><sup>#</sup>, *G11*<sub>OE7</sub><sup>#</sup> and *G11*<sub>OE13</sub><sup>#</sup> plants. Values are means  $\pm$  SE, ( $n \geq 60$  stomata from at least 6 plants per genotype, two independent experiments;  $P < 0.05$ , one-way ANOVA and Tukey's test).

**Supplemental Table S5. Measurement of stomatal dimensions in mature leaves of Col-0, *g10g11*, *pme6-c*, *g10g11pme6-c* and *g10g11pgx3-c* plants.**

| Genotype            | Avg<br>stomatal<br>complex length<br>( $\mu\text{m}$ ) | Avg<br>guard cell<br>width<br>( $\mu\text{m}$ ) | Avg<br>stomatal<br>pore length<br>( $\mu\text{m}$ ) | Avg<br>stomatal pore<br>width<br>( $\mu\text{m}$ ) | Avg<br>pore length/<br>complex<br>length |
|---------------------|--------------------------------------------------------|-------------------------------------------------|-----------------------------------------------------|----------------------------------------------------|------------------------------------------|
| Col-0               | 22.52 $\pm$ 0.46 <sup>a</sup>                          | 4.70 $\pm$ 0.07 <sup>a</sup>                    | 12.72 $\pm$ 0.31 <sup>a</sup>                       | 1.926 $\pm$ 0.061 <sup>a</sup>                     | 0.56 $\pm$ 0.006 <sup>a</sup>            |
| <i>g10g11</i>       | 25.67 $\pm$ 0.28 <sup>b</sup>                          | 5.70 $\pm$ 0.08 <sup>b</sup>                    | 15.44 $\pm$ 0.35 <sup>b</sup>                       | 1.612 $\pm$ 0.040 <sup>b</sup>                     | 0.60 $\pm$ 0.010 <sup>b</sup>            |
| <i>pme6-c</i>       | 21.99 $\pm$ 0.26 <sup>a</sup>                          | 4.53 $\pm$ 0.07 <sup>a</sup>                    | 12.41 $\pm$ 0.27 <sup>a</sup>                       | 1.972 $\pm$ 0.077 <sup>a</sup>                     | 0.55 $\pm$ 0.008 <sup>a</sup>            |
| <i>g10g11pme6-c</i> | 24.73 $\pm$ 0.42 <sup>b</sup>                          | 5.50 $\pm$ 0.07 <sup>b</sup>                    | 14.85 $\pm$ 0.34 <sup>b</sup>                       | 1.574 $\pm$ 0.043 <sup>b</sup>                     | 0.60 $\pm$ 0.007 <sup>b</sup>            |
| <i>g10g11pgx3-c</i> | 25.90 $\pm$ 0.34 <sup>b</sup>                          | 5.42 $\pm$ 0.07 <sup>b</sup>                    | 15.57 $\pm$ 0.33 <sup>b</sup>                       | 1.662 $\pm$ 0.039 <sup>b</sup>                     | 0.60 $\pm$ 0.007 <sup>b</sup>            |

Stomatal complex length, guard cell width, pore length, pore width, and the ratio of pore length to stomatal complex length in mature leaves of 3- to 4-week-old Col-0, *g10g11*, *pme6-c*, *g10g11pme6-c* and *g10g11pgx3-c* plants. Values are means  $\pm$  SE, ( $n \geq 60$  stomata from at least 6 plants per genotype, three independent experiments;  $P < 0.05$ , one-way ANOVA and Tukey's test).
